# Supplementary material
Source: PubMed Central journal article supplement (PMC2755209)

## Supporting Information for

### X-ray Structural Characterization of Imidazolylcobalamin and Histidinylcobalamin: Cobalamin Models for Aquacobalamin bound to the B<sub>12</sub> Transporter Protein Transcobalamin

*Luciana Hannibal, Scott D. Bunge, Rudi van Eldik, Donald W. Jacobsen, Christoph Kratky, Karl Gruber and Nicola E. Brasch*

**Figure S1.** <sup>1</sup>H NMR spectrum of ImCbl<sup>+</sup> in TAPS buffer (0.10 M, pD 8.80). Chemical shifts (δ, ppm): 7.27, 7.08, 6.93, 6.80, 6.72, 6.35(d), 6.20 and 5.95. Minor peaks (~5%) are attributable to HOCbl (7.19, 6.67, 6.50, 6.27(d) and 6.16 ppm) and an unknown impurity/impurities present in the starting material at 7.12, 7.11, 6.84, 6.74, 6.44 and 6.08 ppm.

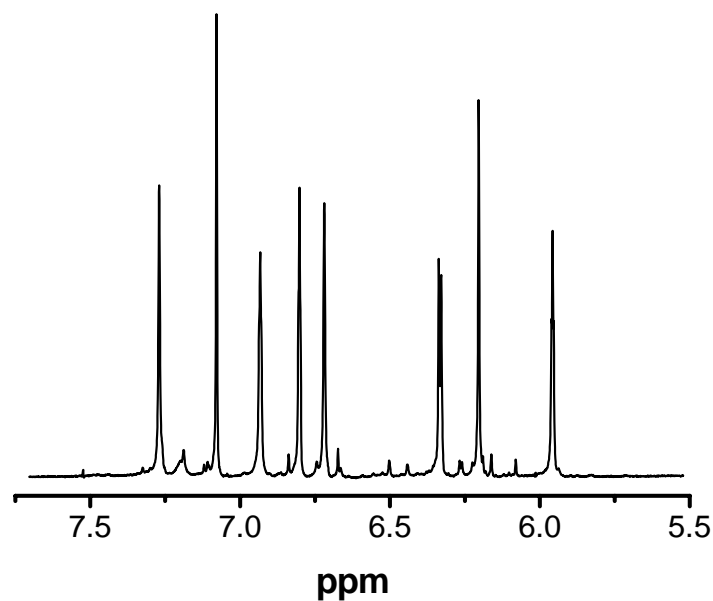

**Figure S2.**  $^1\text{H}$  NMR spectrum of HisCbl $^+$  in TES buffer (0.10 M, pD 7.80). Chemical shifts ( $\delta$ , ppm): 7.28, 7.10, 6.81, 6.72, 6.32(d), 6.20, and 5.75. Chemical shifts of free histidine (labeled L) at 7.95 and 7.17 ppm. Other minor peaks are attributable to HOcbl/H $_2$ Ocbl $^+$  and an unknown impurity/impurities from the starting material.

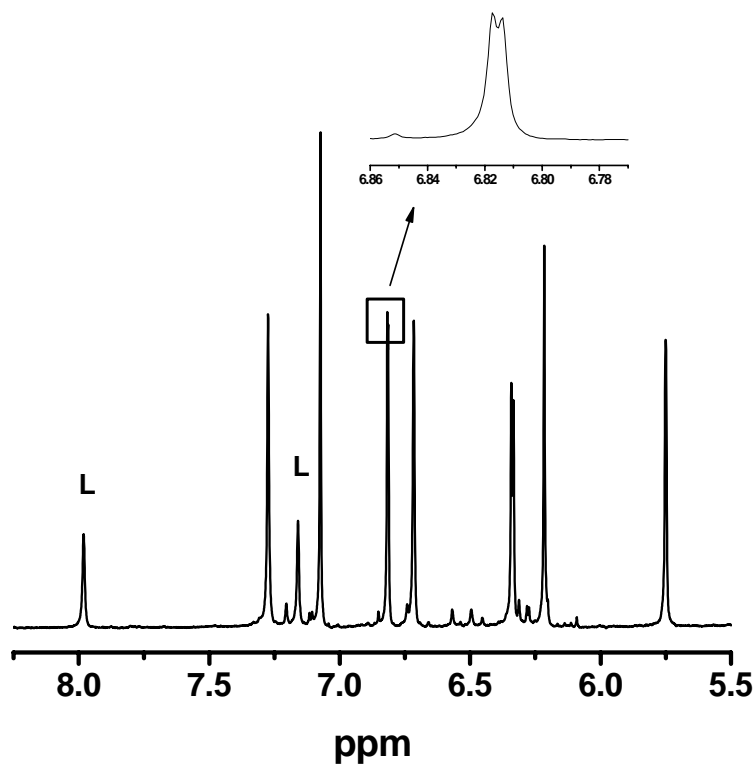

**Figure S3.** UV-visible spectra of HOCbl•HCl, [ImCbl]Cl and [HisCbl]Cl in H<sub>2</sub>O at 25 °C. Absorption maxima occur at 357, 413, and 536 nm for ImCbl<sup>+</sup> and 358, 414, and 538 nm for HisCbl<sup>+</sup>.

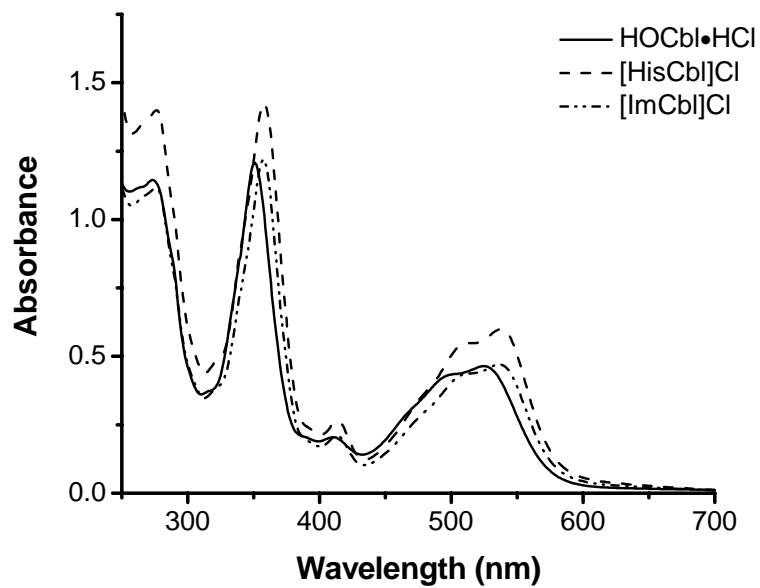

Supplement: NIHMS140797-supplement-Supporting_Information.pdf [file NIHMS140797-supplement-Supporting_Information.pdf]
